# Supplementary material
Source: Research Square preprint supplement (doi:10.21203/rs.3.rs-9587715/v1)
Supplement: Supplementary file 1 [file 8fd843a4bb3bbe3f10f3e5ab.docx]

**Supplementary File 2 — Study Charting Table**

*Modular Biointelligent Starter Cultures for Cocoa Pulp Juice (Mucilage) Fermentation: A Scoping Review*

Anthony Oppong Kyekyeku, Margaret Owusu, John Edem Kongor, Daniel Sitsofe Yabani

CSIR College of Science and Technology (CCST), Accra, Ghana

**Table S1 |** Summary of the 28 studies included in the scoping review, charted by starter architecture, fermentation system, substrate preparation, and primary outcomes reported. Studies are listed in the order identified during screening. Studies marked * were identified through hand search of reference lists.

| **#** | **Author (Year)** | **Study / Focus** | **Starter Architecture** | **Fermentation System** | **Substrate Preparation** | **Primary Outcomes Reported** |
| --- | --- | --- | --- | --- | --- | --- |
| 1 | Chungsiriporn et al. (2025) | Heated fermentation + cocoa juice separation | Yeast-dominant (spontaneous) | Batch vessel with juice separation + heating | Separation of pulp juice from beans | pH, °Brix, physicochemical bean/juice quality |
| 2 | Marwati et al. (2024) | L. plantarum HL-15 as starter + pulp valorisation | LAB starter (Lactiplantibacillus plantarum) | Batch fermentation | Cocoa pulp by-product | Fermentation dynamics, metabolites, pulp valorisation |
| 3 | Lefeber et al. (2010) | Kinetic analysis LAB/AAB in cocoa pulp simulation media | Defined LAB + AAB strains | Cocoa pulp simulation media (bioreactor) | Artificial pulp medium (standardised) | Organic acids, ethanol, metabolic kinetics |
| 4 | Besançon et al. (2024) | Yeast interactions in synthetic cocoa pulp vs real mucilage | Defined yeast mono/co-cultures | Cocoa pulp simulation + real mucilage media | Synthetic + real mucilage; no treatment stated | Volatile aroma compounds, fermentation metabolism |
| 5 | Villarroel-Bastidas et al. (2025) | Cacao mucilage to produce craft beers | Mixed culture / spontaneous | Batch vessel (craft brewery scale) | Cocoa mucilage as adjunct | Ethanol, fermentation kinetics, beer sensory quality |
| 6 | Meersman et al. (2016) | Thermotolerant S. cerevisiae starters for cocoa pulp | Engineered S. cerevisiae (thermotolerant) | Cocoa pulp medium (lab-scale) | Cocoa pulp medium | Acetate ester production, volatile profiles, flavour |
| 7 | Puerari et al. (2012) | Cocoa pulp-based kefir beverages | Kefir grains (multi-kingdom immobilised) | Batch semi-closed (varied temperature) | Cocoa pulp juice; no pretreatment stated | Microbial community, organic acids, sensory acceptance |
| 8 | Koelher et al. (2022) | S. cerevisiae for fruit wines using cocoa honey + pulp | S. cerevisiae strains (defined) | Batch cocoa honey/pulp wine fermentation | Cocoa honey + cocoa pulp | Ethanol, fermentation kinetics, sensory quality |
| 9 | Guirlanda et al. (2021) | Cocoa honey: agro-industrial waste or by-product? (Review) | Review (multiple starter types) | Review of multiple systems | Review | Fermentation products, composition, valorisation options |
| 10 | Meersman et al. (2015) | Breeding robust yeast starters for cocoa pulp fermentations | Engineered S. cerevisiae (hybrid starters) | Cocoa pulp fermentation media | Cocoa pulp medium | Fermentation performance, flavour compound formation |
| 11 | Dzogbefia et al. (1999) | Controlled cocoa fermentation with yeasts: cocoa sweatings | Defined yeasts (controlled inoculation) | Batch sweatings/juice vessels | Cocoa sweatings (pulp juice) | Physicochemical changes, enzymatic activity, microbial counts |
| 12 | Adler et al. (2013) | Core fluxome of LAB under cocoa pulp fermentation simulation | LAB strains (Lactobacillus/Leuconostoc) | Cocoa pulp simulation media (chemostat) | Artificial pulp medium | Metabolic fluxes, organic acids, CO₂ production |
| 13 | Klis et al. (2023) | Cocoa pulp fermentation by Laetiporus persicinus beverage | Laetiporus persicinus (fungal, non-conventional) | Submerged fermentation (diluted pasteurised pulp) | Diluted, pasteurised cocoa pulp | Aroma volatiles, sensory evaluation, non-alcoholic beverage |
| 14 | Ayala et al. (2022) | Valorization of cocoa mucilage waste to ethanol/ethylene | Spontaneous/mixed culture | Batch bioreactor (mucilage waste) | Raw cocoa mucilage | Ethanol yield, fermentation kinetics |
| 15 | García-Ríos et al. (2021) | Thermo-adaptive S. cerevisiae for cocoa pulp fermentations | Thermo-adaptive S. cerevisiae strains | Cocoa pulp fermentation (lab-scale) | Cocoa pulp medium | Growth kinetics, fermentation performance, metabolites |
| 16 | Chetschik et al. (2018) | Aroma of cocoa pulp and influence on fermented cocoa beans | N/A — substrate characterisation + fermentation influence | Cocoa pulp aroma in fermentation context | Fresh cocoa pulp | Aroma-active compounds; influence on cocoa fermentation volatiles |
| 17 | Rodríguez-Castro et al. (2024) | Cocoa mucilage as novel ingredient in kombucha fermentation | Kombucha SCOBY (multi-kingdom immobilised) | Batch closed vessel (cocoa mucilage) | Cocoa mucilage; no pretreatment stated | Physicochemical properties, microbial composition, sensory |
| 18 | Adler et al. (2014) | Metabolic fluxes of AAB under cocoa pulp simulation | Defined AAB strains | Cocoa pulp simulation media (bioreactor) | Artificial pulp medium | Acetate metabolic fluxes, key metabolite pathways |
| 19 | Guimarães et al. (2020) | Cocoa pulp as matrix for probiotic delivery | Probiotic LAB strains (Lactobacillus spp.) | Cocoa pulp matrix (delivery system) | Cocoa pulp as food matrix | Probiotic viability, pH, fermentation parameters |
| 20 | Mota-Gutierrez et al. (2021) | Microbial communities on fermented cocoa pulp-bean mass | Spontaneous community (pulp-bean mass) | Traditional heap/batch | Cocoa pulp-bean mass | Microbial community profiling, metabolites, quality parameters |
| 21 | Lefeber et al. (2011) | Starter strains via cocoa pulp simulation fermentations | Cocoa-specific LAB strains | Cocoa pulp simulation media | Artificial pulp medium | LAB fermentation performance, metabolite profiles, strain selection |
| 22 | Chang et al. (2025)* [Food Chem: X] | Aromatic compounds in cocoa pulp fermentation — volatilomics | Defined yeast starters + LAB | Cocoa pulp batch fermentation | Cocoa pulp medium | Volatile/aroma compounds, machine learning metabolomics |
| 23 | Vizcaino-Almeida et al. (2022) | Non-conventional fermentation: probiotic microorganisms + mucilage substitution | Probiotic strains + conventional yeasts | Modified batch (mucilage/fruit pulp) | Cocoa mucilage (and substitutes) | Fermentation outcomes, metabolites, sensory evaluation |
| 24 | Nunes et al. (2020) | Cocoa pulp as adjunct for beer production | S. cerevisiae (conventional) | Batch beer fermentation with cocoa pulp adjunct | Depectinised cocoa pulp | Beer quality, fermentation kinetics, composition |
| 25 | Bastidas et al. (2023) | Cocoa mucilage: novel substrate for fermented tea-based beverages | Tea SCOBY / kombucha culture | Batch closed vessel (cocoa mucilage) | Cocoa mucilage | Fermentation parameters, metabolites, sensory evaluation |
| 26 | Alvarado-Santos et al. (2023) | Kinetic model for cocoa waste fermentation to ethanol | Spontaneous/mixed culture | Batch bioreactor (cocoa waste pulp) | Cocoa pulp waste | Ethanol kinetics, mathematical model validation |
| 27 | Dias et al. (2007)* | Elaboration of a fruit wine from cocoa pulp | S. cerevisiae (conventional) | Batch wine fermentation | Cocoa pulp juice | Ethanol, physicochemical parameters, sensory quality |
| 28 | Ho VTT, Zhao J, Fleet G. (2015) | Effect of lactic acid bacteria on cocoa bean fermentation — LAB roles in acidification, competitive exclusion, and flavour | LAB strains (Lactobacillus, Leuconostoc) | Cocoa pulp simulation + bean fermentation (lab-scale) | Cocoa pulp/bean matrix | LAB metabolic contributions, acidification kinetics, flavour impact |

*Abbreviations: LAB = lactic acid bacteria; AAB = acetic acid bacteria; SCOBY = symbiotic culture of bacteria and yeast. * Identified through hand search of reference lists (Dias et al., 2007; Chang et al., 2025 [Food Chem. X]).*

# Search Strategy and Study Selection

**Database:** Scopus. **Search date:** 5 April 2026. **No date or language limits applied.**

**Search string:** "cocoa pulp juice" OR "cocoa mucilage" OR "cocoa pulp" AND "fermentation" OR "starter culture" OR "consortium" OR "mixed culture" OR "kefir" OR "wine" OR "non-alcoholic beverage" OR "quorum sensing".

**Screening results:** 70 records retrieved; 1 duplicate removed; 69 screened at title/abstract stage. 38 excluded (E1 = whole cocoa bean fermentation only, n = 25; E2 = no fermentation outcomes, n = 7; E3 = unrelated applications, n = 6). 32 full texts assessed; 6 excluded (E2-FT = composition/enzyme studies only, no fermentation outcomes). 26 eligible from database search + 2 from hand search = 28 total included. See Fig. 1 (main manuscript) for PRISMA-ScR flow diagram.

## Eligibility Criteria

Studies were included if they met all four criteria:

**1. Substrate relevance:** Cocoa pulp juice, cocoa mucilage, or cocoa pulp-derived liquid fractions used as primary fermentation substrate.

**2. Fermentation relevance:** Study investigated microbial fermentation outcomes (alcoholic, non-alcoholic, functional beverage, or ingredient-oriented fermentation).

**3. Starter relevance:** Work included defined inoculation strategies or clearly described microbial drivers of fermentation.

**4. Outcome reporting:** At least one of: metabolite profiles, aroma/volatile compounds, microbial dynamics, sensory evaluation, or process parameters (pH, temperature, °Brix).

Studies were excluded if focused exclusively on whole cocoa bean cotyledon fermentation without explicit treatment of cocoa pulp juice as the primary substrate, or if not available as full-text peer-reviewed articles.
