# Supplementary material
Source: Research Square preprint supplement (doi:10.21203/rs.3.rs-9587715/v1)
Supplement: Supplementary file 2 [file 94e44aa8908d631f36cfb99e.docx]

# Supplementary File 1— PRISMA-ScR Checklist

*Modular Biointelligent Starter Cultures for Cocoa Pulp Juice (Mucilage) Fermentation: A Scoping Review*

Tricco AC et al. Ann Intern Med. 2018; 169:467–473. https://doi.org/10.7326/M18-0850

| **Section** | **Item #** | **PRISMA-ScR Item** | **Where Reported in Manuscript** | **Status** |
| --- | --- | --- | --- | --- |
| **Title** | 1 | Identify the report as a scoping review. | Title page — 'A Scoping Review' stated in full title | **✓** |
| **Abstract** | 2 | Provide a structured summary including background, objectives, eligibility criteria, sources of evidence, charting methods, results, and conclusions. | Abstract — all elements addressed | **✓** |
| **Introduction** | 3a | Describe the rationale for the review in the context of what is already known. | Sections 1.1–1.2 — variability, substrate definition, existing gaps | **✓** |
| **Introduction** | 3b | Provide an explicit statement of the objectives or questions being addressed by the review. | Section 1.4 — four explicit review aims stated | **✓** |
| **Methods** | 4 | Indicate whether a review protocol exists; if so, provide a registration number. | Section 2.1 — no pre-registration; exploratory scoping review per Levac et al. [19] | **✓** |
| **Methods** | 5 | Specify characteristics of the sources of evidence used as eligibility criteria. | Section 2.2 — four eligibility criteria: substrate, fermentation, starter, outcome relevance | **✓** |
| **Methods** | 6 | Describe all information sources and the date the search was last conducted. | Section 2.3 — Scopus; search date 5 April 2026 | **✓** |
| **Methods** | 7 | Present the full electronic search strategy for at least 1 database, including any limits applied. | Section 2.3 — full Boolean search string reported; no date or language limits applied | **✓** |
| **Methods** | 8 | State the process for selecting sources of evidence (screening and eligibility). | Section 2.3 — two-stage screening: title/abstract then full text; eligibility criteria applied at both stages | **✓** |
| **Methods** | 9 | Describe the methods of charting the data from the included sources of evidence. | Section 2.5 — charting framework: starter type, system, process variables, outcomes | **✓** |
| **Methods** | 10 | Describe any process of critically appraising sources of evidence. | N/A — scoping reviews do not require formal quality appraisal per Levac et al. [19]; narrative synthesis used | **N/A** |
| **Methods** | 11 | Describe the methods of handling and summarizing the data. | Section 2.5 — narrative synthesis organised by modular design logic; gaps identified by reporting inconsistency | **✓** |
| **Results** | 12 | Give numbers of sources of evidence screened, assessed for eligibility, and included, with reasons for exclusions at each stage. Recommend use of a flow diagram. | Section 2.3 and Fig. 1 (PRISMA-ScR flow diagram) — 70 retrieved, 69 after dedup, 38 excluded T/A (E1=25, E2=7, E3=6), 6 excluded FT, 28 final included | **✓** |
| **Results** | 13 | For each source of evidence, present characteristics relevant to the review question. | Table 1 — charting table with all 28 studies and 6 data fields each | **✓** |
| **Results** | 14 | Present the critical appraisal results, if conducted. | N/A — see item 10 | **N/A** |
| **Results** | 15 | For each included source of evidence, present the relevant data. | Table 1 (Section 6) — per-source data for all 28 studies; Sections 6–7 — narrative synthesis of evidence by product class and starter architecture | **✓** |
| **Results** | 16 | Summarise and/or present the charted data as it relates to the review questions and objectives. | Sections 6–8 — evidence mapped against four review aims from Section 1.4; Section 9 addresses validation gaps arising from the synthesis | **✓** |
| **Discussion** | 17 | Summarise the main results of the review, including their relevance to the review question and objectives. | Section 10 — Conclusion synthesises main findings across all four aims | **✓** |
| **Discussion** | 18 | Discuss the limitations of the scoping review process. | Section 9 — four validation gaps identified: absence of comparative benchmarking under matched conditions; absence of QS experimental validation in acidic pulp juice; laboratory conditions not representative of tropical field settings; inconsistent safety and stability reporting across studies | **✓** |
| **Discussion** | 19 | Provide a general interpretation of the results and consider the implications for future research. | Section 10 — Future Perspectives: four research priorities stated | **✓** |
| **Funding** | 20 | Describe sources of funding or other support; describe the role of funders. | Declarations — 'This research received no specific grant from any funding agency in the public, commercial, or not-for-profit sectors.' | **✓** |
| **Optional** | O1 | If done, describe the process used to consult with stakeholders, specialists, or experts. | Not applicable — expert consultation not conducted | **N/A** |
| **Optional** | O2 | If done, describe how the consultation exercise influenced the scoping review. | Not applicable | **N/A** |

*Note: Item 10 (critical appraisal) is not applicable to scoping reviews, consistent with Levac et al. (2010) and PRISMA-ScR guidance. Items O1–O2 (stakeholder consultation) were not conducted. Funding confirmed in Declarations: 'This research received no specific grant from any funding agency in the public, commercial, or not-for-profit sectors.' Screening process described in Section 2.3; study characteristics in Section 2.4. Figure numbering: Fig. 1 = PRISMA-ScR flow diagram (Section 2.3); Fig. 2 = Modular biointelligent starter framework (Section 8). Table 1 = Study charting table (Section 6); Table 2 = Modular blueprint summary (Section 8).*
